# Supplementary material for: Europium(ii) bis[tetrafluoro-2-(pentafluoroethoxy)ethanesulfonate] – structure and spectroscopic properties of a new near-UV emitter
Source: Royal Society of Chemistry journal article supplement (doi:10.1039/d3nj02429f), 2023-01-01
Supplement: d3nj02429f1.pdf [file d3nj02429f1.pdf]

Crystal structures of  $[\text{Eu}(\text{CF}_3\text{CF}_2\text{OCF}_2\text{CF}_2\text{SO}_3)_3(\text{H}_2\text{O})_5] \text{H}_2\text{O}$  (**1**) and  
 $\text{Na}[\text{Eu}(\text{CF}_3\text{CF}_2\text{OCF}_2\text{CF}_2\text{SO}_3)_2(\text{H}_2\text{O})_6](\text{CF}_3\text{CF}_2\text{OCF}_2\text{CF}_2\text{SO}_3)_2 \text{H}_2\text{O}$  (**2**)

Crystals of both substances were found in the electrolyzer, when the reduction regime was relaxed. They were of bad quality. Synthesis of  $\text{Na}[\text{Eu}(\text{CF}_3\text{CF}_2\text{OCF}_2\text{CF}_2\text{SO}_3)_2(\text{H}_2\text{O})_6](\text{CF}_3\text{CF}_2\text{OCF}_2\text{CF}_2\text{SO}_3)_2 \text{H}_2\text{O}$  was repeated. 0.176 g of  $\text{Eu}_2\text{O}_3$  (0.5 mmol), 0.040 g of NaOH (1 mmol) and 1.280 g of were reacted together in appr. 3 ml of water. The solution was evaporated to appr. 1 ml and 4 ml of 1-propanol were added. The crystal for the data collection was selected after a week's evaporation at ambient conditions. An attempt to prepare  $[\text{Eu}(\text{CF}_3\text{CF}_2\text{OCF}_2\text{CF}_2\text{SO}_3)_3(\text{H}_2\text{O})_5] \text{H}_2\text{O}$  crystals of better quality was unsuccessful. The crystals were mounted on a Rigaku SYNERGY diffractometer equipped with a CCD camera. The structure was solved with SHELXS<sup>1</sup> and refined with SHELXL-2017.<sup>2</sup> The H atoms were not located. The non-H atoms were refined anisotropically. The investigated crystal of  $[\text{Eu}(\text{CF}_3\text{CF}_2\text{OCF}_2\text{CF}_2\text{SO}_3)_3(\text{H}_2\text{O})_5] \text{H}_2\text{O}$  (**1**) was twinned. The data collection and refinement details for **1** and **2** are given in Table S1 and the respective Eu-O distances – in Table S2.

Table S1. Data collection and refinement details for **1** and **2**.

|                                                                            | <b>1</b>                                                           | <b>2</b>                                                             |
|----------------------------------------------------------------------------|--------------------------------------------------------------------|----------------------------------------------------------------------|
| Chemical formula                                                           | $\text{C}_{12}\text{H}_{12}\text{EuF}_{27}\text{O}_{18}\text{S}_3$ | $\text{C}_{16}\text{H}_{14}\text{EuF}_{36}\text{NaO}_{23}\text{S}_4$ |
| $M_r$                                                                      | 1205.36                                                            | 1561.46                                                              |
| Crystal system, space group                                                | monoclinic, $P2_1/c$                                               | monoclinic, $P2_1/c$                                                 |
| Temperature (K)                                                            | 100                                                                | 100                                                                  |
| $a, b, c$ (Å)                                                              | 16.934 (6), 12.916 (4), 32.216 (16)                                | 17.953 (4), 24.722 (6), 10.768 (3)                                   |
| $\beta$ (°)                                                                | 96.17 (6)                                                          | 103.58 (3)                                                           |
| $V$ (Å <sup>3</sup> )                                                      | 7005 (5)                                                           | 4646 (2)                                                             |
| $Z$                                                                        | 8                                                                  | 4                                                                    |
| Radiation type                                                             | Mo $K\alpha$                                                       | Mo $K\alpha$                                                         |
| $\mu$ (mm <sup>-1</sup> )                                                  | 2.18                                                               | 1.76                                                                 |
| Crystal size (mm)                                                          | 0.31 × 0.16 × 0.05                                                 | 0.14 × 0.10 × 0.03                                                   |
| Absorption correction                                                      | multi-scan                                                         | analytical                                                           |
| $T_{\min}, T_{\max}$                                                       | 0.928, 1.000                                                       | 0.831, 0.964                                                         |
| No. of measured, independent and observed [ $I > 2\sigma(I)$ ] reflections | 84091, 84091, 51179                                                | 67942, 13646, 9704                                                   |
| $R_{\text{int}}$                                                           | not merged                                                         | 0.102                                                                |

|                                                                |                                                                                      |                                                                                     |
|----------------------------------------------------------------|--------------------------------------------------------------------------------------|-------------------------------------------------------------------------------------|
| $(\sin \theta/\lambda)_{\max}$ ( $\text{\AA}^{-1}$ )           | 1.052                                                                                | 0.705                                                                               |
| $R[F^2 > 2\sigma(F^2)], wR(F^2), S$                            | 0.093, 0.248, 1.06                                                                   | 0.052, 0.139, 1.02                                                                  |
| No. of reflections                                             | 84091                                                                                | 13646                                                                               |
| No. of parameters                                              | 1096                                                                                 | 730                                                                                 |
| No. of restraints                                              | 8                                                                                    | 0                                                                                   |
| Weights                                                        | $w = 1/[\sigma^2(F_o^2) + (0.0826P)^2 + 60.9735P]$<br>where $P = (F_o^2 + 2F_c^2)/3$ | $w = 1/[\sigma^2(F_o^2) + (0.073P)^2 + 10.4835P]$<br>where $P = (F_o^2 + 2F_c^2)/3$ |
| $\Delta\rho_{\max}, \Delta\rho_{\min}$ ( $e \text{\AA}^{-3}$ ) | 8.86, -2.70                                                                          | 3.72, -1.18                                                                         |

Table S2. Eu-O distances in **1** and **2**.

| <b>1</b> |           |          |           |
|----------|-----------|----------|-----------|
| Eu1—O21  | 2.375 (4) | Eu2—OW10 | 2.381 (4) |
| Eu1—OW1  | 2.384 (4) | Eu2—O51  | 2.381 (4) |
| Eu1—OW3  | 2.383 (4) | Eu2—OW7  | 2.383 (4) |
| Eu1—OW5  | 2.389 (5) | Eu2—O61  | 2.386 (5) |
| Eu1—O11  | 2.399 (4) | Eu2—OW8  | 2.389 (5) |
| Eu1—O31  | 2.397 (4) | Eu2—O41  | 2.409 (4) |
| Eu1—OW2  | 2.415 (4) | Eu2—OW9  | 2.418 (4) |
| Eu1—OW4  | 2.425 (4) | Eu2—OW6  | 2.433 (4) |
| <b>2</b> |           |          |           |
| Eu—OW5   | 2.385 (3) | Eu—O11   | 2.396 (3) |
| Eu—OW1   | 2.391 (3) | Eu—OW3   | 2.415 (3) |
| Eu—OW4   | 2.395 (3) | Eu—OW2   | 2.421 (3) |
| Eu—OW6   | 2.396 (3) | Eu—O21   | 2.437 (3) |

### Brief description of the structures

In **1** there are two independent Eu sites and the  $\text{CF}_3\text{CF}_2\text{OCF}_2\text{CF}_2\text{SO}_3$  anion generated by S1 is partially disordered. In **2** there are four anions and the charge is compensated by a  $\text{Na}^+$  cation which was present in the reaction mixture as impurity. All the  $\text{Eu}^{3+}$  cations in both structures are 8-coordinate and contrary to the Eu(II) compound, described in the main part of the paper, they are more hydrated: the cations in **1** are bonded to 5 water molecules each ant that in **2** – to 6 ones.

The sulfonate ligands in **1** are monodentate and in **2** the ligands generated by S1 and S2 form bridges between Eu and Na, that generated by S3 is monodentate, being bonded to Na, and

the sulfonate group generated by S4 bridges two Na cations. The structure fragments are shown in Figs. S1 and S2, and the packing diagrams – in Figs. S3 and S4.

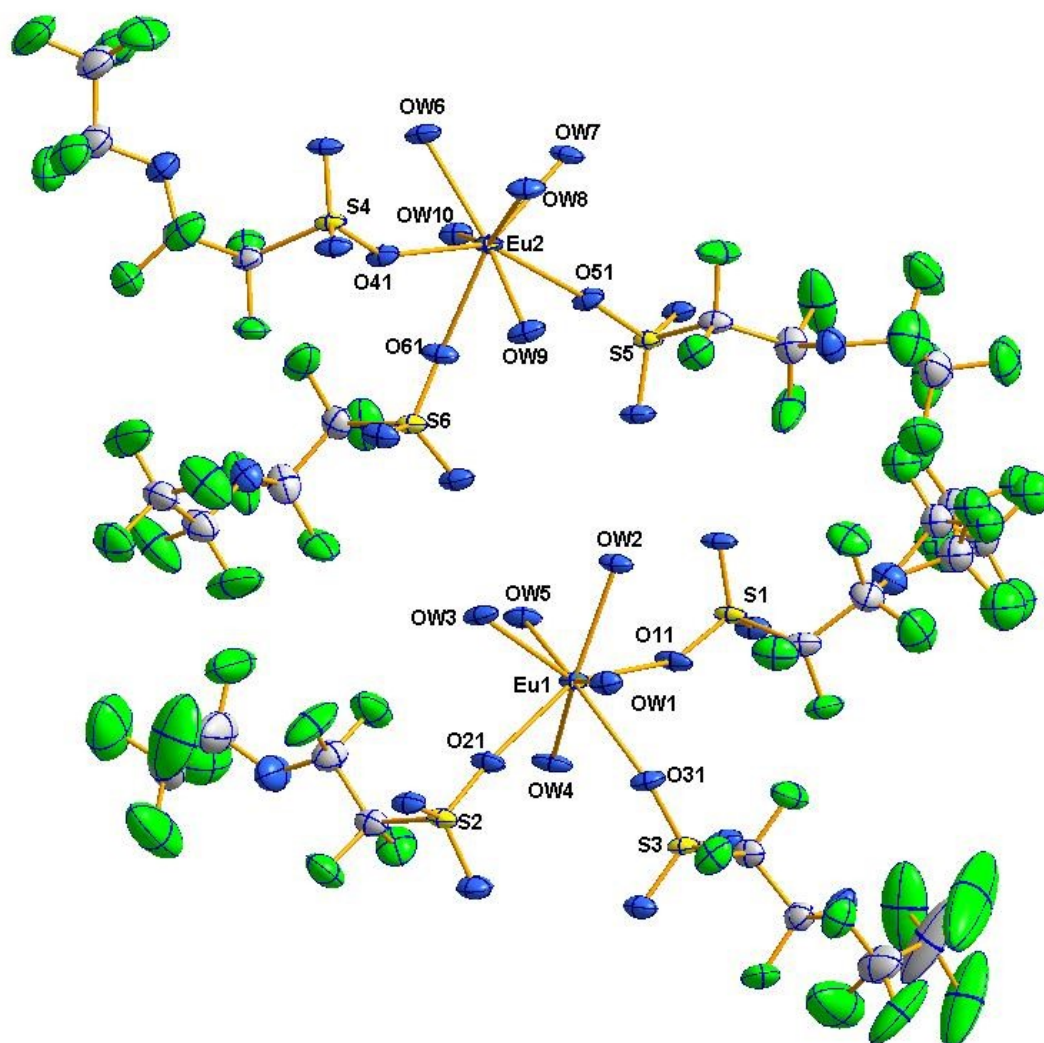

Fig. S1. Fragment of the structure in **1**. The labels are shown for Eu, S and coordinated O atoms. Uncoordinated water molecules (OW11 and OW12) are not shown.

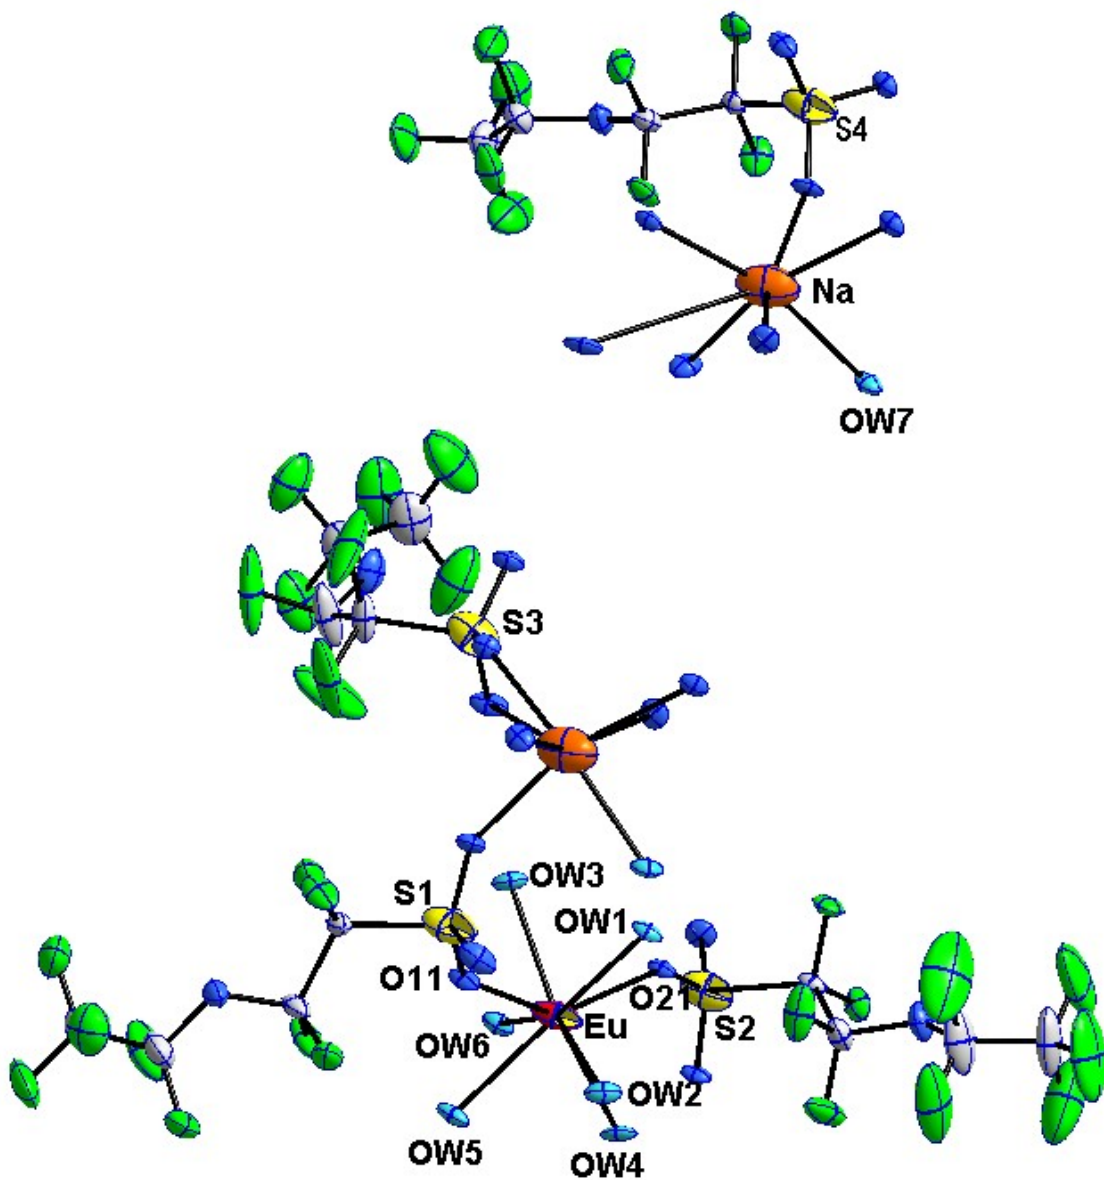

Fig. S2. Fragment of the structure in **2**. The labels are shown for Eu, S and symmetry independent Na and coordinated O atoms. The sulfonate O atoms are blue, the water molecules are turquoise.

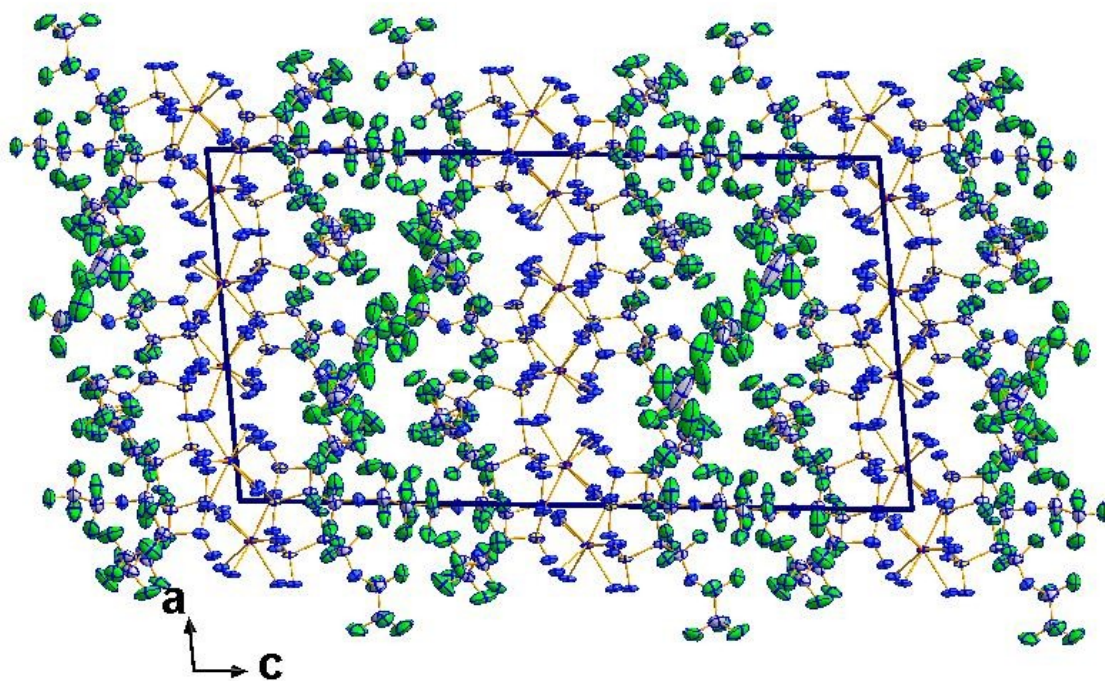

Fig. S3. Packing diagram of **1**.

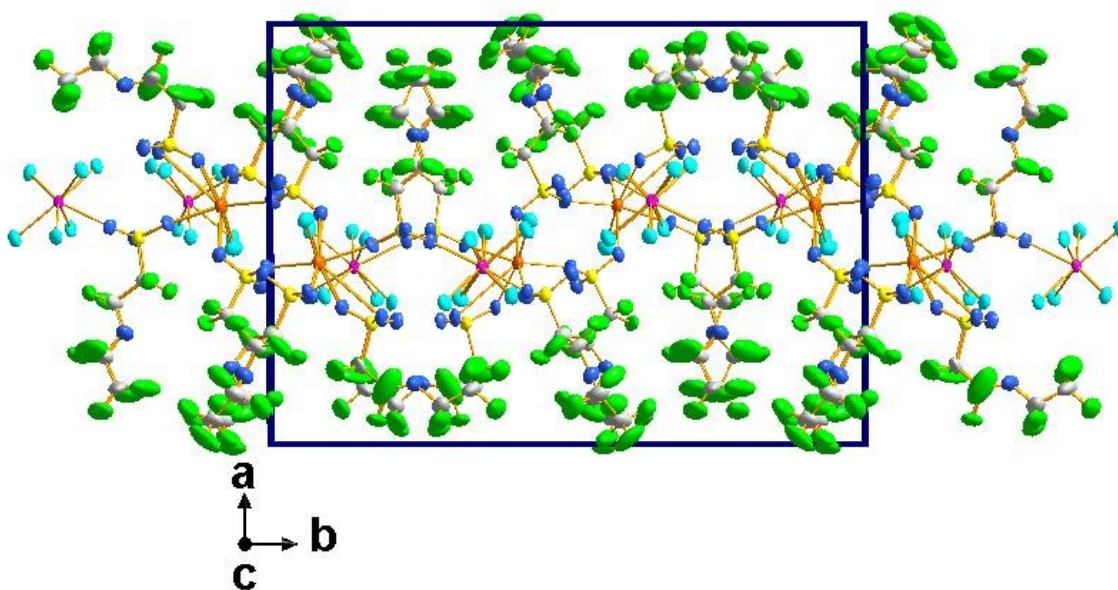

Fig. S4. Packing diagram of **2**. The Eu atoms are pink, the Na ones – orange, other colours are attributed as in Fig. S2.

---

<sup>1</sup> G. M. Sheldrick, *Acta Cryst.*, 2008, **A64**, 112-122.

<sup>2</sup> G. M. Sheldrick, *Acta Cryst.*, 2015, **C71**, 3-8.
